# Supplementary material
Source: publisher figshare collection journal article supplement (https://geolsoc.figshare.com/ndownloader/files/16214513)
Supplement: Supplementary file 1 [file 16214513]

				Ratios										Ages
Well ID	Depth (m)	Sample ID	Grain ID	207/235	207/235 2s	206/238	206/238 2 s	Rho	238/206	238/206 2 s	207/206	207/206 2 s	Rho	206/238	206/238 2 s	207/235	207/235 2 s	207/206	207/206 2 s	Probability
18/20-2z	3468	25g2	13	5.02	0.31	0.311	0.017	0.6361	3.2154	0.1758	0.1167	0.006	0.5938	1745.6258	95.4201	1822.7012	112.5572	1906.2822	98.0094	0.0162
18/20-2z	3468	25g66	13	0.608	0.039	0.0735	0.004	0.6019	13.6054	0.7404	0.06	0.0034	0.3186	457.2077	24.882	482.298	30.9369	603.5746	34.2026	0.0212
18/20-2z	3468	25g36	13	5.06	0.28	0.312	0.017	0.5647	3.2051	0.1746	0.114	0.0059	0.6668	1750.5411	95.382	1829.4256	101.233	1864.1336	96.4771	0.0213
18/20-2z	3468	25g9	13	0.74	0.05	0.0853	0.0041	0.382	11.7233	0.5635	0.062	0.0038	0.18	527.6806	25.3633	562.4056	38.0004	674.1087	41.3163	0.0216
18/20-2z	3468	25g45	13	0.361	0.035	0.0447	0.0026	0.2067	22.3714	1.3012	0.0588	0.0059	0.3639	281.9002	16.3969	312.9611	30.3425	559.6989	56.1603	0.0262
18/20-2z	3468	25g14	13	3.97	0.41	0.3089	0.025	0.6292	3.2373	0.262	0.0909	0.006	0.1267	1735.2915	140.4412	1628.0853	168.1398	1444.5084	95.3471	0.0265
18/20-2z	3468	25g28	13	0.629	0.055	0.0737	0.0042	0.381	13.5685	0.7732	0.0629	0.0053	0.1977	458.4086	26.1237	495.4727	43.3243	704.8515	59.3913	0.0306
18/20-2z	3468	25g51	13	4.83	0.27	0.308	0.017	0.7188	3.2468	0.1792	0.1119	0.0057	0.4222	1730.8574	95.5343	1790.1376	100.0698	1830.5021	93.2427	0.0459
18/20-2z	3468	25g24	13	1.455	0.082	0.1594	0.0078	0.4018	6.2735	0.307	0.0674	0.0038	0.5087	953.4416	46.6552	911.9427	51.3947	850.1586	47.9318	0.0536
18/20-2z	3468	25g32	13	3.35	0.21	0.249	0.016	0.631	4.0161	0.2581	0.0953	0.0054	0.6056	1433.3166	92.1007	1492.7916	93.578	1534.0104	86.9219	0.0624
18/20-2z	3468	25g59	13	1.476	0.1	0.162	0.01	0.4732	6.1728	0.381	0.0666	0.0043	0.5354	967.8818	59.7458	920.5913	62.3707	825.2898	53.2845	0.0642
18/20-2z	3468	25g49	13	3.36	0.21	0.254	0.014	0.8571	3.937	0.217	0.0968	0.0048	0.3363	1459.0713	80.4213	1495.1232	93.4452	1563.3475	77.5214	0.0653
18/20-2z	3468	25g30	13	4.01	0.23	0.2804	0.013	0.6028	3.5663	0.1653	0.1039	0.0059	0.1943	1593.3765	73.8727	1636.2247	93.8483	1694.9255	96.247	0.1032
18/20-2z	3468	25g5	13	3.28	0.2	0.2482	0.011	0.3772	4.029	0.1786	0.0955	0.0053	0.172	1429.1862	63.3402	1476.3192	90.0195	1537.9552	85.3525	0.1088
18/20-2z	3468	25g4	13	3.41	0.21	0.2549	0.014	0.6512	3.9231	0.2155	0.0974	0.0054	0.5098	1463.6963	80.3913	1506.7012	92.7881	1574.924	87.3161	0.1141
18/20-2z	3468	25g73	13	0.531	0.041	0.0668	0.0034	0.6773	14.9701	0.7619	0.0585	0.0043	-0.1603	416.8478	21.2168	432.4731	33.3925	548.5383	40.3199	0.1226
18/20-2z	3468	25g74	13	0.539	0.03	0.0674	0.0035	0.3652	14.8368	0.7705	0.056	0.0031	0.6047	420.4724	21.8346	437.765	24.3654	452.3685	25.0418	0.1346
18/20-2z	3468	25g25	13	1.123	0.073	0.1218	0.0062	0.471	8.2102	0.4179	0.0679	0.0041	0.2822	740.9156	37.7149	764.411	49.6901	865.5032	52.2616	0.1963
18/20-2z	3468	25g27	13	5.08	0.3	0.339	0.017	0.2903	2.9499	0.1479	0.1095	0.0064	0.5369	1881.857	94.3704	1832.7712	108.2345	1791.1095	104.6858	0.2356
18/20-2z	3468	25g64	13	1.456	0.095	0.1556	0.0075	0.557	6.4267	0.3098	0.0691	0.004	0.331	932.2784	44.9363	912.3562	59.5287	901.7269	52.1984	0.2969
18/20-2z	3468	25g57	13	3.19	0.18	0.2583	0.013	0.6306	3.8715	0.1948	0.0904	0.0051	0.5358	1481.1385	74.5443	1454.74	82.0856	1433.9941	80.9001	0.3082
18/20-2z	3468	25g20	13	14.65	0.81	0.529	0.029	0.4333	1.8904	0.1036	0.1996	0.011	0.6653	2737.2372	150.0565	2792.7816	154.4132	2822.9284	155.5722	0.3113
18/20-2z	3468	25g50	13	4.75	0.3	0.324	0.017	0.5942	3.0864	0.1619	0.1052	0.0058	0.2824	1809.2342	94.929	1776.1079	112.1752	1717.8131	94.7083	0.3216
18/20-2z	3468	25g33	13	12.71	0.75	0.501	0.025	0.6464	1.996	0.0996	0.1834	0.0099	0.4587	2618.0922	130.6433	2658.4003	156.8686	2683.8589	144.8757	0.3302
18/20-2z	3468	25g37	13	1.13	0.069	0.1226	0.0065	0.1456	8.1566	0.4324	0.066	0.0046	0.5704	745.5112	39.5255	767.7534	46.8805	806.3757	56.2019	0.3344
18/20-2z	3468	25g62	13	0.733	0.043	0.0926	0.0046	0.3764	10.7991	0.5365	0.0565	0.0029	0.2268	570.8956	28.3598	558.3124	32.7523	472.0706	24.2302	0.3895
18/20-2z	3468	25g13	13	3.24	0.17	0.2593	0.013	0.65	3.8565	0.1933	0.0936	0.005	0.4169	1486.2595	74.5136	1466.7851	76.9609	1500.0562	80.1312	0.4425
18/20-2z	3468	25g38	13	0.376	0.025	0.0503	0.0025	0.2794	19.8807	0.9881	0.0531	0.0032	0.3052	316.3632	15.7238	324.0907	21.5486	333.0722	20.0721	0.4501
18/20-2z	3468	25g71	13	1.528	0.09	0.1547	0.0078	0.5003	6.4641	0.3259	0.0718	0.0039	0.4956	927.2559	46.7524	941.6952	55.4663	980.2769	53.2462	0.4742
18/20-2z	3468	25g46	13	0.371	0.022	0.0519	0.0028	0.4797	19.2678	1.0395	0.0522	0.003	0.507	326.176	17.5972	320.3944	18.9991	294.1808	16.9069	0.4982
18/20-2z	3468	25g60	13	2.161	0.13	0.1954	0.01	0.3823	5.1177	0.2619	0.0821	0.0052	0.496	1150.5615	58.8824	1168.5926	70.2994	1247.9031	79.0389	0.5053
18/20-2z	3468	25g21	13	13.01	0.8	0.508	0.026	0.466	1.9685	0.1008	0.1857	0.01	0.3519	2648.0855	135.5319	2680.3791	164.8196	2704.4475	145.6353	0.5112
18/20-2z	3468	25g61	13	0.579	0.037	0.073	0.0035	0.1074	13.6986	0.6568	0.057	0.0036	0.4759	454.2044	21.7769	463.8186	29.6395	491.5332	31.0442	0.5223
18/20-2z	3468	25g41	13	3.17	0.19	0.248	0.014	0.4094	4.0323	0.2276	0.0932	0.0055	0.5546	1428.1532	80.6216	1449.8817	86.9014	1491.9546	88.0445	0.5227
18/20-2z	3468	25g6	13	4.89	0.28	0.3178	0.016	0.5035	3.1466	0.1584	0.1123	0.0063	0.531	1778.9762	89.5646	1800.5341	103.0981	1836.9671	103.0534	0.5268
18/20-2z	3468	25g11	13	3.35	0.19	0.2639	0.013	0.583	3.7893	0.1867	0.0926	0.0052	0.503	1509.7642	74.3726	1492.7916	84.6658	1479.7202	83.0944	0.5313
18/20-2z	3468	25g8	13	0.521	0.034	0.0697	0.0034	0.1404	14.3472	0.6999	0.0559	0.0039	0.6701	434.348	21.1877	425.8192	27.7886	448.3988	31.2836	0.5471
18/20-2z	3468	25g44	13	4.55	0.29	0.306	0.018	0.6551	3.268	0.1922	0.1114	0.0055	0.3473	1720.9929	101.2349	1740.1614	110.9114	1822.381	89.9739	0.5684
18/20-2z	3468	25g34	13	1.905	0.12	0.1809	0.0093	0.6536	5.5279	0.2842	0.0762	0.0041	0.188	1071.8895	55.1054	1082.8384	68.2103	1100.3299	59.2041	0.5784
18/20-2z	3468	25g69	13	2.228	0.14	0.1998	0.0093	0.2693	5.005	0.233	0.08	0.005	0.3793	1174.2458	54.6571	1189.8896	74.7686	1196.9878	74.8117	0.5835
18/20-2z	3468	25g40	13	1.836	0.12	0.1803	0.0097	0.5524	5.5463	0.2984	0.0732	0.0043	0.5048	1068.6133	57.4906	1058.4298	69.1784	1019.4949	59.8884	0.6596
18/20-2z	3468	25g7	13	2.427	0.14	0.2165	0.011	0.3583	4.6189	0.2347	0.0814	0.0046	0.533	1263.3546	64.1889	1250.6323	72.142	1231.1187	69.5718	0.6619
18/20-2z	3468	25g53	13	0.588	0.037	0.0748	0.0039	0.4345	13.369	0.697	0.0574	0.0035	0.5051	465.0095	24.2451	469.5896	29.549	506.9346	30.9106	0.7144
18/20-2z	3468	25g55	13	2.068	0.12	0.1948	0.01	0.289	5.1335	0.2635	0.0791	0.0049	0.6549	1147.3251	58.8976	1138.2707	66.0505	1174.6384	72.7652	0.7507
18/20-2z	3468	25g68	13	1.765	0.099	0.1724	0.01	0.5129	5.8005	0.3365	0.076	0.0043	0.7164	1025.3211	59.4734	1032.6858	57.924	1095.0706	61.9579	0.7584
18/20-2z	3468	25g63	13	1.722	0.11	0.1699	0.0075	0.5313	5.8858	0.2598	0.0728	0.004	0.1903	1011.5602	44.6539	1016.771	64.9505	1008.3906	55.4061	0.7939
18/20-2z	3468	25g19	13	15.28	0.88	0.555	0.03	0.5131	1.8018	0.0974	0.1968	0.012	0.3325	2845.9342	153.8343	2832.8551	163.1487	2799.8405	170.722	0.8073
18/20-2z	3468	25g47	13	4.25	0.25	0.3	0.016	0.5218	3.3333	0.1778	0.1012	0.0056	0.5579	1691.3087	90.2031	1683.7367	99.0433	1646.2399	91.0963	0.8239
18/20-2z	3468	25g54	13	2.857	0.17	0.236	0.011	0.6618	4.2373	0.1975	0.0866	0.0043	0.3101	1365.8686	63.6634	1370.6551	81.5581	1351.6092	67.1122	0.826
18/20-2z	3468	25g16	13	0.325	0.025	0.045	0.0025	0.3261	22.2222	1.2346	0.0518	0.0038	0.3972	283.7511	15.7639	285.7414	21.9801	276.5913	20.2905	0.8446
18/20-2z	3468	25g56	13	6.41	0.35	0.372	0.02	0.6617	2.6882	0.1445	0.1262	0.0069	0.6691	2038.8044	109.6131	2033.6401	111.0412	2045.696	111.8487	0.8858
18/20-2z	3468	25g12	13	3.46	0.2	0.2648	0.013	0.4169	3.7764	0.1854	0.0954	0.0052	0.4934	1514.353	74.3451	1518.1487	87.7543	1535.9841	83.7224	0.9038
18/20-2z	3468	25g26	13	1.253	0.075	0.1368	0.0065	0.6348	7.3099	0.3473	0.0658	0.0036	0.3676	826.5418	39.2728	824.7577	49.367	800.02	43.7701	0.9063
18/20-2z	3468	25g43	13	0.287	0.018	0.0404	0.002	0.1753	24.7525	1.2254	0.0508	0.0035	0.5186	255.3119	12.6392	256.1953	16.068	231.7652	15.9681	0.9179
18/20-2z	3468	25g35	13	3.69	0.22	0.276	0.014	0.5141	3.6232	0.1838	0.0971	0.0052	0.5061	1571.1857	79.6978	1569.2061	93.557	1569.1469	84.0326	0.9488
18/20-2z	3462	20g49	15	0.456	0.044	0.0554	0.0034	0.392	18.0505	1.1078	0.0605	0.0056	0.0956	347.5896	21.3322	381.4723	36.8087	621.5045	57.5277	0.0233
18/20-2z	3462	20g15	15	6.2	0.48	0.345	0.017	0.3099	2.8986	0.1428	0.1275	0.0086	0.2509	1910.6786	94.1494	2004.4484	155.1831	2063.7869	139.2045	0.0345
18/20-2z	3462	20g31	15	0.302	0.019	0.0401	0.0019	0.3827	24.9377	1.1816	0.0545	0.0033	0.2917	253.4528	12.009	267.9612	16.8585	391.768	23.7217	0.0537
18/20-2z	3462	20g44	15	2.044	0.13	0.2022	0.011	0.0848	4.9456	0.269	0.0752	0.0051	0.1461	1187.1279	64.5816	1130.2964	71.8877	1073.852	72.8277	0.1049
18/20-2z	3462	20g9	15	0.391	0.029	0.0512	0.0026	0.5878	19.5313	0.9918	0.0555	0.0037	-0.0989	321.8847	16.3457	335.0997	24.8539	432.4212	28.8281	0.1322
18/20-2z	3462	20g28	15	3.22	0.2	0.246	0.012	0.3579	4.065	0.1983	0.0967	0.0057	0.2285	1417.8142	69.1617	1461.9842	90.8065	1561.4094	92.0376	0.1644
18/20-2z	3462	20g36	15	4.83	0.27	0.3282	0.015	0.4967	3.0469	0.1393	0.1084	0.0056	0.3925	1829.6512	83.6221	1790.1376	100.0698	1772.6997	91.5786	0.2187
18/20-2z	3462	20g3	15	2	0.12	0.1842	0.0091	0.5634	5.4289	0.2682	0.08	0.0043	0.572	1089.8788	53.8431	1115.5123	66.9307	1196.9878	64.3381	0.2316
18/20-2z	3462	20g17	15	0.425	0.028	0.0551	0.0027	0.1131	18.1488	0.8893	0.0567	0.0039	0.472	345.757	16.9427	359.6201	23.6926	479.8841	33.0079	0.2571
18/20-2z	3462	20g50	15	0.493	0.048	0.0616	0.0036	0.0717	16.2338	0.9487	0.0568	0.0057	0.4152	385.3486	22.5204	406.9529	39.6222	483.7765	48.548	0.2575
18/20-2z	3462	20g34	15	4.82	0.26	0.3271	0.015	0.4214	3.0572	0.1402	0.1084	0.0053	0.4518	1824.3101	83.6584	1788.3944	96.4694	1772.6997	86.6726	0.2894
18/20-2z	3462	20g40	15	6.01	0.32	0.367	0.017	0.4019	2.7248	0.1262	0.122	0.0061	0.6619	2015.2687	93.3503	1977.2937	105.2802	1985.6797	99.284	0.3107
18/20-2z	3462	20g19	15	4.5	0.24	0.3027	0.014	0.5363	3.3036	0.1528	0.1065	0.0054	0.4101	1704.6835	78.8423	1730.9723	92.3185	1740.355	88.2434	0.3714
18/20-2z	3462	20g29	15	4.9	0.29	0.3289	0.018	0.5653	3.0404	0.1664	0.1062	0.006	0.2958	1833.0478	100.3188	1802.2565	106.6642	1735.1832	98.0329	0.3937
18/20-2z	3462	20g23	15	4.58	0.28	0.315	0.018	0.8163	3.1746	0.1814	0.1068	0.0055	0.3662	1765.2646	100.8723	1745.6351	106.7201	1745.509	89.8904	0.4773
18/20-2z	3462	20g13	15	1.214	0.075	0.1353	0.0069	0.6373	7.391	0.3769	0.0666	0.0036	0.1192	818.0302	41.7177	807.0273	49.8575	825.2898	44.6103	0.4865
18/20-2z	3462	20g20	15	1.529	0.14	0.1613	0.011	0.3981	6.1996	0.4228	0.07	0.0047	0.3978	963.9972	65.7407	942.0967	86.2613	928.3531	62.3323	0.4962
18/20-2z	3462	20g33	15	2.19	0.13	0.2036	0.0097	0.4219	4.9116	0.234	0.0785	0.0047	0.3865	1194.6306	56.9151	1177.8656	69.919	1159.556	69.4256	0.5105
18/20-2z	3462	20g46	15	0.784	0.047	0.0972	0.0047	0.3312	10.2881	0.4975	0.0588	0.0035	0.3524	597.9789	28.9146	587.7626	35.2358	559.6989	33.3154	0.5154
18/20-2z	3462	20g22	15	12.33	0.66	0.509	0.025	0.7711	1.9646	0.0965	0.1741	0.0089	0.4827	2652.3589	130.273	2629.8595	140.7711	2597.453	132.7819	0.5503
18/20-2z	3462	20g35	15	13.11	0.71	0.523	0.026	0.6818	1.912	0.0951	0.1818	0.009	0.1896	2711.8909	134.8168	2687.6009	145.5528	2669.3595	132.1465	0.5639
18/20-2z	3462	20g27	15	10.97	0.61	0.483	0.023	0.5078	2.0704	0.0986	0.1666	0.0086	0.6154	2540.3195	120.9676	2520.5905	140.1605	2523.7725	130.2788	0.6474
18/20-2z	3462	20g26	15	5.33	0.3	0.34	0.016	0.6068	2.9412	0.1384	0.1141	0.0056	0.4205	1886.6696	88.7844	1873.6866	105.4608	1865.7162	91.5689	0.6716
18/20-2z	3462	20g8	15	3.95	0.25	0.2891	0.015	0.3554	3.459	0.1795	0.099	0.0058	0.512	1637.0301	84.9376	1623.991	102.7842	1605.3658	94.0517	0.7257
18/20-2z	3462	20g37	15	1.877	0.1	0.1824	0.0084	0.4736	5.4825	0.2525	0.0749	0.0037	0.4626	1080.0727	49.7402	1073.0041	57.1659	1065.8193	52.6506	0.7398
18/20-2z	3462	20g39	15	10.8	0.6	0.472	0.023	0.5401	2.1186	0.1032	0.1643	0.0088	0.2788	2492.3257	121.4481	2506.0664	139.2259	2500.4	133.9228	0.7457
18/20-2z	3462	20g45	15	1.84	0.12	0.1803	0.0082	0.154	5.5463	0.2522	0.0736	0.0046	0.4404	1068.6133	48.6003	1059.8609	69.1214	1030.5202	64.4075	0.7588
18/20-2z	3462	20g32	15	0.513	0.028	0.0671	0.003	0.4593	14.9031	0.6663	0.0558	0.0029	0.423	418.6604	18.718	420.4645	22.9493	444.4193	23.0971	0.851
18/20-2z	3462	20g24	15	0.394	0.024	0.0539	0.0031	0.585	18.5529	1.067	0.0523	0.003	0.5351	338.4211	19.4639	337.2872	20.5454	298.5485	17.1252	0.8917
18/20-2z	3462	20g5	15	0.375	0.024	0.0513	0.0027	0.3068	19.4932	1.026	0.0549	0.0037	0.2018	322.4979	16.9736	323.3525	20.6946	408.1528	27.5076	0.9326
18/20-2z	3462	20g47	15	0.556	0.033	0.0723	0.0035	0.2396	13.8313	0.6696	0.0576	0.0035	0.5627	449.9976	21.7841	448.9196	26.6445	514.58	31.2679	0.9345
18/20-2z	3462	20g16	15	4.93	0.26	0.3232	0.016	0.7006	3.0941	0.1532	0.1109	0.0055	0.6284	1805.3379	89.3732	1807.4064	95.3196	1814.2152	89.9746	0.9416
18/20-4	3649.6	8g14	20	4.59	0.25	0.3213	0.014	0.5179	3.1124	0.1356	0.1042	0.0053	0.415	1796.0748	78.2603	1747.4532	95.1772	1700.2385	86.4805	0.1018
18/20-4	3649.6	8g15	20	0.385	0.026	0.0498	0.0025	0.2509	20.0803	1.008	0.0568	0.0037	0.3572	313.2936	15.7276	330.7104	22.3337	483.7765	31.5136	0.1026
18/20-4	3649.6	8g7	20	4.32	0.24	0.3118	0.015	0.3805	3.2072	0.1543	0.1024	0.0056	0.4422	1749.5584	84.1673	1697.1857	94.2881	1668.0738	91.2228	0.1379
18/20-4	3649.6	8g16	20	0.3135	0.018	0.0452	0.0023	0.4558	22.1239	1.1258	0.0497	0.0027	0.4066	284.9847	14.5014	276.8902	15.898	180.9869	9.8323	0.2691
18/20-4	3649.6	8g12	20	3.754	0.2	0.282	0.013	0.7008	3.5461	0.1635	0.0975	0.005	0.4986	1601.427	73.8246	1582.9683	84.335	1576.8448	80.8638	0.4303
18/20-4	3649.6	8g10	20	4.73	0.27	0.3121	0.014	0.3918	3.2041	0.1437	0.1083	0.006	0.364	1751.0324	78.5468	1772.57	101.1826	1771.0148	98.1172	0.5179
18/20-4	3649.6	8g4	20	0.284	0.022	0.0395	0.002	0.288	25.3165	1.2818	0.0522	0.0039	0.2428	249.733	12.6447	253.8257	19.6626	294.1808	21.979	0.6537
18/20-4	3649.6	8g2	20	2.851	0.15	0.2389	0.01	0.0735	4.1859	0.1752	0.0881	0.0045	0.6496	1380.9759	57.8056	1369.0743	72.0313	1384.6657	70.7264	0.7055
18/20-4	3649.6	8g13	20	0.325	0.026	0.0448	0.0024	0.2533	22.3214	1.1958	0.0524	0.0039	0.2373	282.5172	15.1348	285.7414	22.8593	302.9044	22.5444	0.7655
18/20-4	3649.6	8g1	20	4.79	0.26	0.32	0.015	0.5012	3.125	0.1465	0.1095	0.0059	0.3703	1789.7292	83.8936	1783.147	96.7888	1791.1095	96.5073	0.8371
18/20-4	3649.6	8g3	20	4.681	0.25	0.3162	0.014	0.0462	3.1626	0.14	0.1083	0.0057	0.696	1771.1445	78.4188	1763.8496	94.2026	1771.0148	93.2113	0.8555
18/20-4	3649.6	8g11	20	4.91	0.31	0.324	0.017	0.4973	3.0864	0.1619	0.1128	0.0065	0.3793	1809.2342	94.929	1803.9761	113.8967	1845.009	106.317	0.8852
18/20-4	3649.6	8g5	20	4.8	0.27	0.3187	0.015	0.5519	3.1377	0.1477	0.1097	0.0058	0.3493	1783.3773	83.9368	1784.8991	100.4006	1794.4323	94.8743	0.9605
18/20-4	3644.6	18g17	22	0.338	0.04	0.0417	0.0027	0.4303	23.9808	1.5527	0.0576	0.0064	0.0696	263.3618	17.0522	295.6551	34.9888	514.58	57.1756	0.0212
18/20-4	3644.6	18g22	22	4.3	0.38	0.284	0.024	0.8076	3.5211	0.2976	0.1078	0.0073	0.4211	1611.4759	136.1811	1693.3612	149.6459	1762.5613	119.3571	0.0282
18/20-4	3644.6	18g12	22	8.65	0.74	0.407	0.032	0.7802	2.457	0.1932	0.1509	0.0095	0.3753	2201.1912	173.0666	2301.8306	196.9196	2356.1498	148.3328	0.0397
18/20-4	3644.6	18g6	22	1.98	0.19	0.179	0.018	0.8964	5.5866	0.5618	0.0776	0.0045	0.4941	1061.5092	106.7439	1108.7204	106.3924	1136.6512	65.9141	0.0566
18/20-4	3644.6	18g27	22	3.14	0.2	0.2376	0.014	0.2833	4.2088	0.248	0.0955	0.0059	0.3802	1374.208	80.9719	1442.5504	91.8822	1537.9552	95.015	0.0699
18/20-4	3644.6	18g2	22	2.24	0.2	0.195	0.017	0.8297	5.1282	0.4471	0.0816	0.0054	0.3377	1148.4041	100.1173	1193.6572	106.5765	1235.9331	81.7897	0.086
18/20-4	3644.6	18g26	22	5.49	0.44	0.361	0.026	0.5445	2.7701	0.1995	0.1067	0.0064	0.3969	1986.912	143.1017	1899.0329	152.1994	1743.793	104.5949	0.091
18/20-4	3644.6	18g20	22	4.08	0.39	0.278	0.028	0.8304	3.5971	0.3623	0.1063	0.007	0.4892	1581.2819	159.2658	1650.3135	157.7506	1736.9091	114.3778	0.1147
18/20-4	3644.6	18g3	22	4.33	0.36	0.31	0.02	0.7333	3.2258	0.2081	0.1004	0.0069	0.001	1740.7068	112.3037	1699.0925	141.264	1631.5052	112.1254	0.2158
18/20-4	3644.6	18g11	22	5.84	0.42	0.364	0.023	0.5454	2.7473	0.1736	0.1164	0.0074	0.3773	2001.1059	126.4435	1952.3661	140.4099	1901.6579	120.8958	0.2867
18/20-4	3644.6	18g18	22	4.85	0.35	0.317	0.022	0.8342	3.1546	0.2189	0.1098	0.0057	0.3832	1775.0615	123.1904	1793.6149	129.4361	1796.091	93.2397	0.5742
18/20-4	3644.6	18g30	22	6.71	0.6	0.385	0.027	0.2563	2.5974	0.1822	0.1234	0.011	0.4354	2099.598	147.2445	2073.9384	185.449	2005.9582	178.8131	0.6936
18/20-4	3644.6	18g24	22	4.89	0.49	0.321	0.031	0.9	3.1153	0.3009	0.111	0.0063	0.1312	1794.611	173.3113	1800.5341	180.4216	1815.8519	103.0619	0.8875
18/20-4	3854.9	16g10	25	4.73	0.27	0.33	0.015	0.4761	3.0303	0.1377	0.1048	0.0055	0.4952	1838.3816	83.5628	1772.57	101.1826	1710.808	89.7848	0.0444
18/20-4	3854.9	16g20	25	0.384	0.023	0.0555	0.0027	0.3596	18.018	0.8766	0.0514	0.003	0.5042	348.2004	16.9395	329.977	19.7642	258.809	15.1056	0.0531
18/20-4	3854.9	16g15	25	2.871	0.16	0.2451	0.011	0.5018	4.08	0.1831	0.0845	0.0045	0.2582	1413.1562	63.4219	1374.334	76.5912	1304.0892	69.4485	0.1287
18/20-4	3854.9	16g17	25	4.59	0.29	0.3001	0.015	0.334	3.3322	0.1666	0.1114	0.0062	0.4454	1691.8046	84.562	1747.4532	110.4055	1822.381	101.4252	0.1399
18/20-4	3854.9	16g5	25	4.921	0.26	0.3326	0.016	0.5985	3.0066	0.1446	0.1085	0.0054	0.6897	1850.9713	89.0425	1805.8642	95.4125	1774.3828	88.3103	0.1473
18/20-4	3854.9	16g28	25	0.365	0.025	0.0517	0.0029	0.7587	19.3424	1.085	0.0516	0.0028	0.2349	324.9502	18.2274	315.9409	21.6398	267.7245	14.5277	0.154
18/20-4	3854.9	16g23	25	1.491	0.093	0.1603	0.0081	0.2196	6.2383	0.3152	0.0691	0.0042	0.4214	958.4438	48.4304	926.7241	57.8037	901.7269	54.8083	0.2226
18/20-4	3854.9	16g7	25	4.59	0.3	0.3202	0.015	0.3973	3.123	0.1463	0.1037	0.0063	0.1658	1790.7058	83.8869	1747.4532	114.2126	1691.373	102.7546	0.2288
18/20-4	3854.9	16g4	25	2.438	0.16	0.2207	0.01	0.4133	4.531	0.2053	0.0804	0.0045	0.2444	1285.5727	58.2498	1253.8863	82.2895	1206.8173	67.5457	0.2432
18/20-4	3854.9	16g11	25	1.628	0.088	0.1614	0.0079	0.4678	6.1958	0.3033	0.0745	0.004	0.4756	964.5523	47.2117	981.0866	53.0317	1055.0436	56.6466	0.4203
18/20-4	3854.9	16g24	25	4.51	0.28	0.315	0.017	0.3064	3.1746	0.1713	0.1023	0.0061	0.3314	1765.2646	95.2682	1732.8168	107.5806	1666.2664	99.357	0.4375
18/20-4	3854.9	16g16	25	4.81	0.27	0.325	0.016	0.3692	3.0769	0.1515	0.1082	0.0057	0.6316	1814.1013	89.3096	1786.6483	100.29	1769.3279	93.2086	0.4626
18/20-4	3854.9	16g33	25	6.71	0.38	0.375	0.019	0.6849	2.6667	0.1351	0.1282	0.0064	0.4513	2052.8846	104.0128	2073.9384	117.4511	2073.4367	103.5101	0.5216
18/20-4	3854.9	16g8	25	0.796	0.052	0.0945	0.0051	-0.012	10.582	0.5711	0.0602	0.0046	0.5728	582.096	31.4147	594.5697	38.8412	610.7709	46.6702	0.5556
18/20-4	3854.9	16g32	25	7.18	0.4	0.397	0.019	0.4794	2.5189	0.1206	0.1322	0.007	0.5203	2155.2108	103.1461	2134.0226	118.8871	2127.3926	112.6456	0.5842
18/20-4	3854.9	16g1	25	4.093	0.22	0.2892	0.014	0.5196	3.4578	0.1674	0.1025	0.0055	0.6632	1637.5302	79.2719	1652.9086	88.8443	1669.8789	89.6033	0.6096
18/20-4	3854.9	16g19	25	4.79	0.27	0.3213	0.016	0.6507	3.1124	0.155	0.1089	0.0058	0.2989	1796.0748	89.4404	1783.147	100.5114	1781.096	94.8609	0.6636
18/20-4	3854.9	16g36	25	4.84	0.29	0.324	0.018	0.3939	3.0864	0.1715	0.1078	0.006	0.5334	1809.2342	100.513	1791.8777	107.3646	1762.5613	98.1017	0.6727
18/20-4	3854.9	16g30	25	0.893	0.06	0.1071	0.0057	0.1758	9.3371	0.4969	0.0613	0.0042	0.5196	655.8839	34.907	647.9798	43.5373	649.7773	44.5198	0.7062
18/20-4	3854.9	16g14	25	2.049	0.11	0.1906	0.009	0.5566	5.2466	0.2477	0.0771	0.0041	0.4559	1124.6245	53.104	1131.9629	60.7691	1123.7774	59.7599	0.7241
18/20-4	3854.9	16g25	25	1.77	0.092	0.1731	0.0085	0.6937	5.777	0.2837	0.074	0.0036	0.7437	1029.1688	50.5369	1034.5203	53.7717	1041.4675	50.666	0.7505
18/20-4	3854.9	16g31	25	5.05	0.31	0.326	0.016	0.5927	3.0675	0.1506	0.1151	0.0062	0.2591	1818.9647	89.2743	1827.7487	112.1984	1881.4503	101.3466	0.78
18/20-4	3854.9	16g9	25	2.295	0.12	0.2074	0.011	0.7727	4.8216	0.2557	0.0806	0.0041	0.4904	1214.9511	64.4381	1210.749	63.3071	1211.7085	61.6378	0.826
18/20-4	3854.9	16g37	25	12.93	0.69	0.512	0.025	0.4678	1.9531	0.0954	0.1834	0.0099	0.6648	2665.1621	130.1349	2674.5644	142.7262	2683.8589	144.8757	0.8417
18/20-4	3854.9	16g26	25	0.398	0.025	0.0542	0.0026	0.28	18.4502	0.8851	0.0517	0.0032	0.4126	340.2558	16.3222	340.1966	21.3691	272.164	16.8457	0.9954
Rho - error correlation of preceding isotope ratio columns
